# Supplementary material
Source: Springer Nature journal article supplement (https://www.springermedizin.de/resource/supplementary/12889_2010_2299_MOESM1_ESM.pdf/9485318)
Supplement: MOESM1 [file 9485318]

3,017 type 2 diabetes patients considered for study inclusion

**Non-response:**

**Patient:**

- Refused to participate (n = 51)
- Language difficulties (n = 10)
- Advanced age (n = 12)
- Poor physical / mental condition (n = 81)
- No show for baseline interview (n = 39)
- Other reasons (n = 89)

**Primary care practice nurse:**

- Lack of time (n = 138)
- Omitting to include a newly diagnosed patient (n = 95)
- Omitting to include an insulin-using patient (n = 42)

M<sub>0</sub>: 2,460 patients included

2,448 patients underwent M<sub>0</sub> interview  
1,850 patients returned M<sub>0</sub> self-report questionnaire

**Loss to follow-up M<sub>1</sub>:**

- Deceased (n = 66)
- Moved (n = 36)
- Poor physical / mental condition (n = 23)
- Referral to secondary care (n = 37)
- Remission of diabetes (n = 8)
- Main health care provider is general practitioner (n = 4)
- Refused to participate (n = 7)
- Forms not returned by primary care practice nurse (n = 19)
- Other reasons (n = 24)
- Reason unknown (n = 11)

M<sub>1</sub>: 2,225 patients included

2,215 patients underwent M<sub>1</sub> interview  
1,642 patients returned M<sub>1</sub> self-report questionnaire

**Loss to follow-up M<sub>2</sub>:**

- Deceased (n = 51)
- Moved (n = 18)
- Poor physical / mental condition (n = 13)
- Referral to secondary care (n = 30)
- Remission of diabetes (n = 21)
- Main health care provider is general practitioner (n = 1)
- Refused to participate (n = 1)
- Forms not returned by primary care practice nurse (n = 31)
- Other reasons (18)
- Reason unknown (9)

M<sub>2</sub>: 2,032 patients included

2,032 patients underwent M<sub>2</sub> interview  
1,310 patients returned M<sub>2</sub> self-report questionnaire
